# Supplementary material for: Single Dose Based Ertapenem Prophylaxis Reduces Surgical Site Infection after Selective Hepatectomy of Hepatocellular Carcinoma: A Propensity Score Matching Study
Source: Hindawi journal article supplement (doi:10.1155/2018/2520191), 2018-08-30

# Supplementary Figure 1 Propensity score matching analysis

## Standardized differences before matching

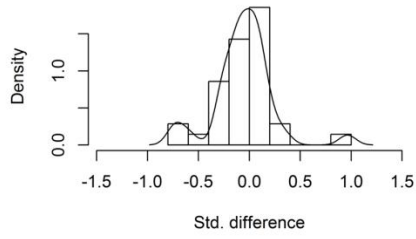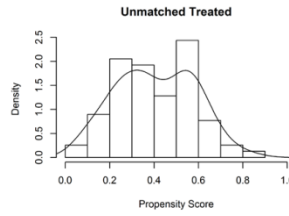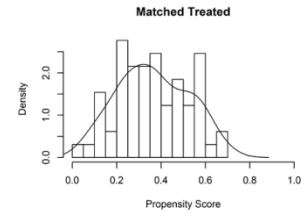

## Standardized differences after matching

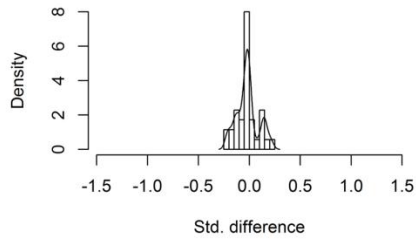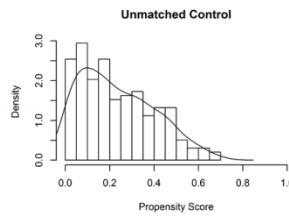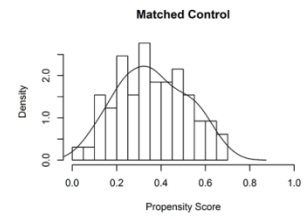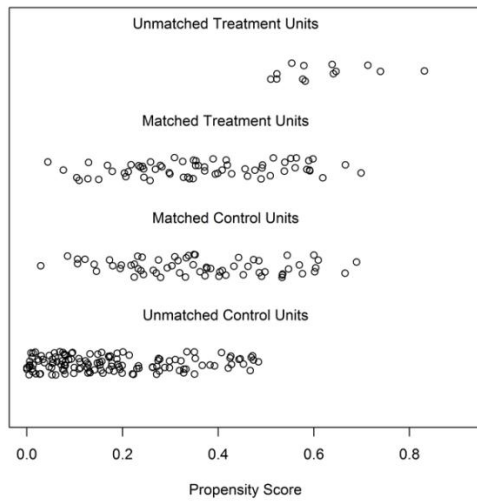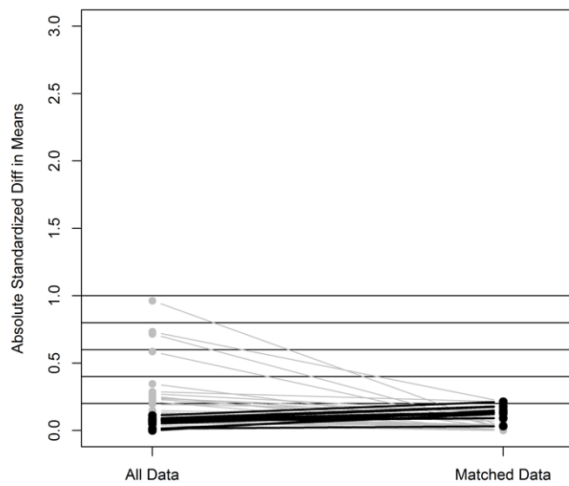

Supplement: f1 [file 2520191.f1.pdf]
